# Supplementary material for: Circular RNA circPHLPP2 promotes tumor growth and anti-PD-1 resistance through binding ILF3 to regulate IL36γ transcription in colorectal cancer
Source: PubMed Central journal article supplement — Mol Cancer. 2024 Dec 18;23:272. doi: 10.1186/s12943-024-02192-8 (PMC11658269; doi:10.1186/s12943-024-02192-8), 2024-12-18

Fig.1i

HCT116

MC38

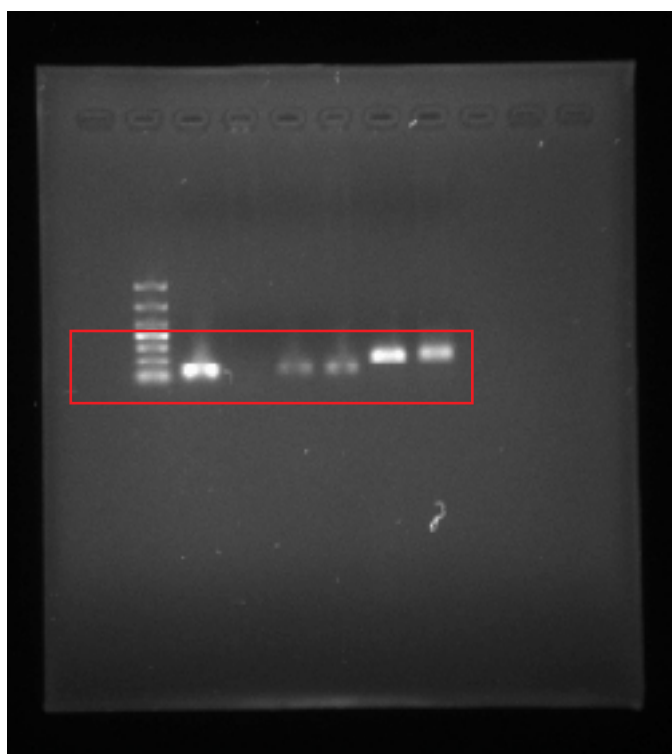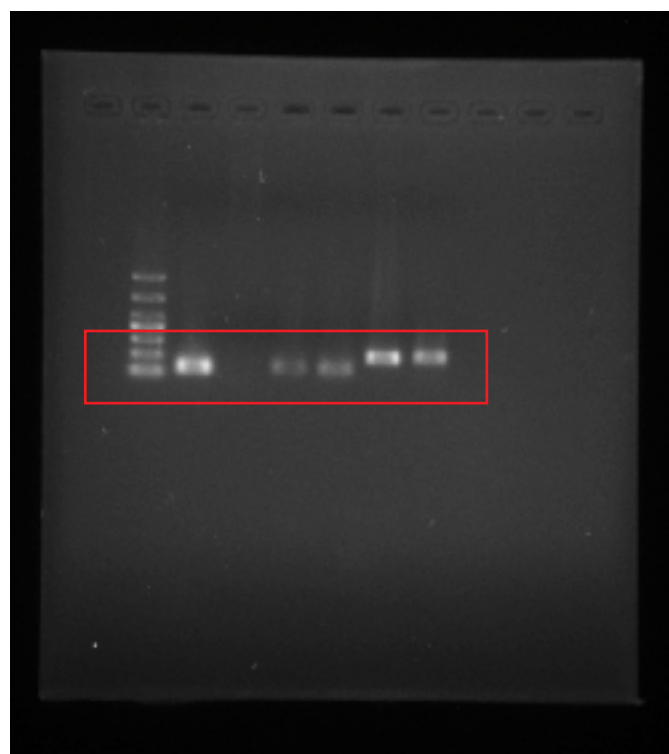

Fig.4d

IL-36y

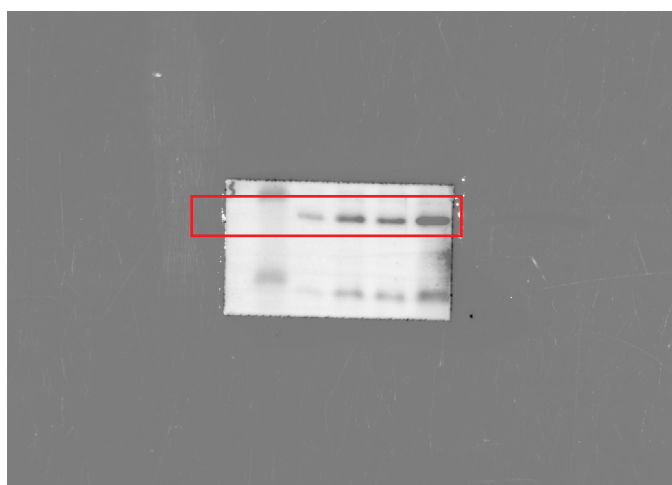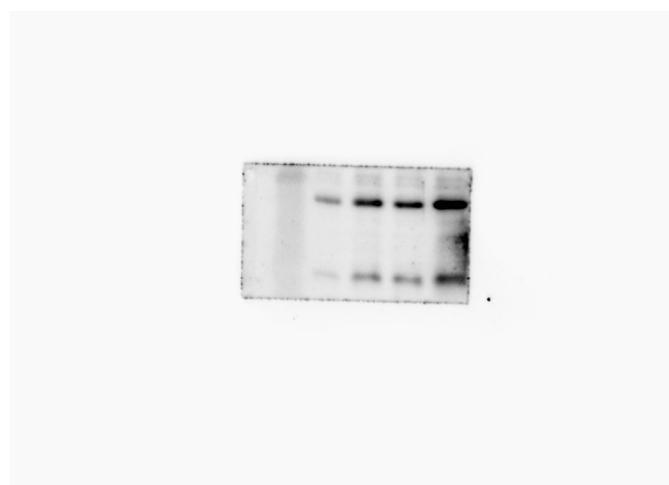

GAPDH

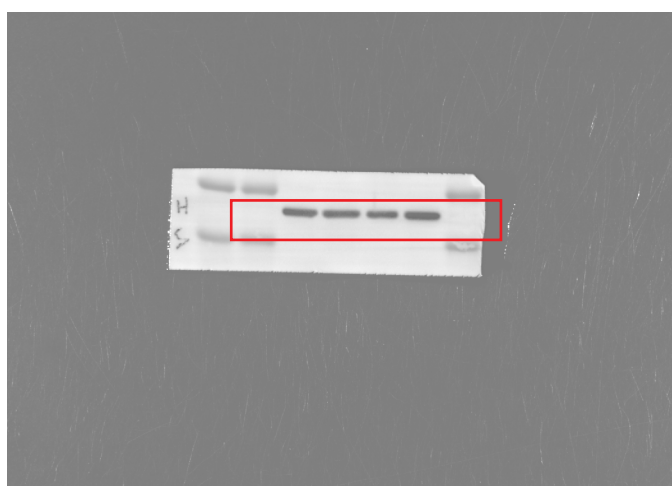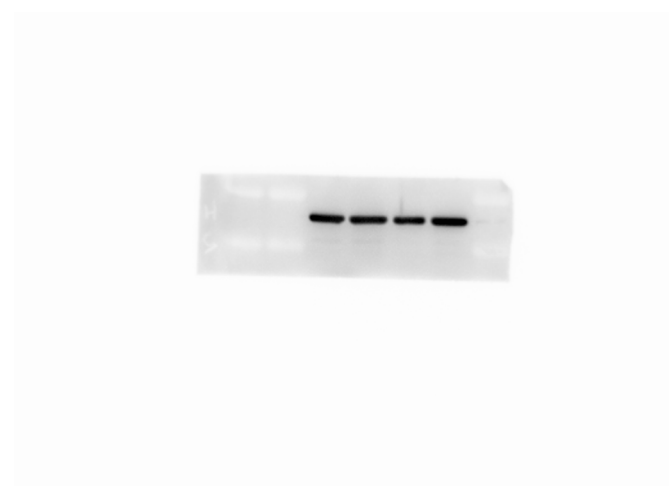

Fig.4e

IL-36 $\gamma$

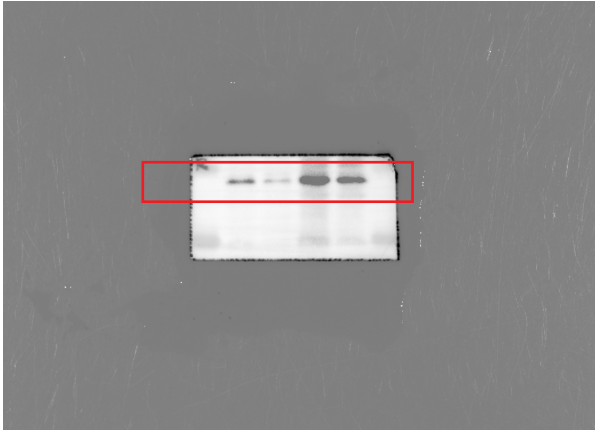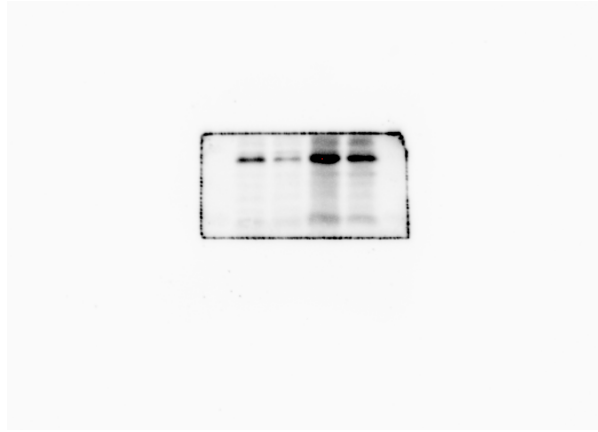

GAPDH

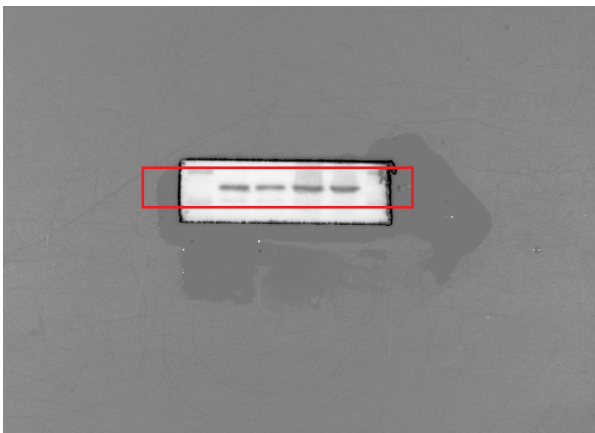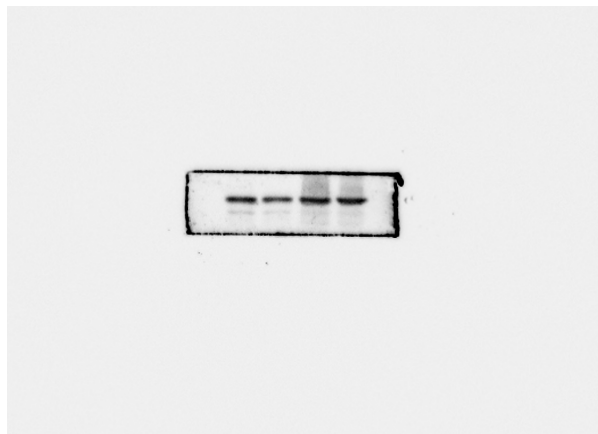

Fig.5b

ILF3

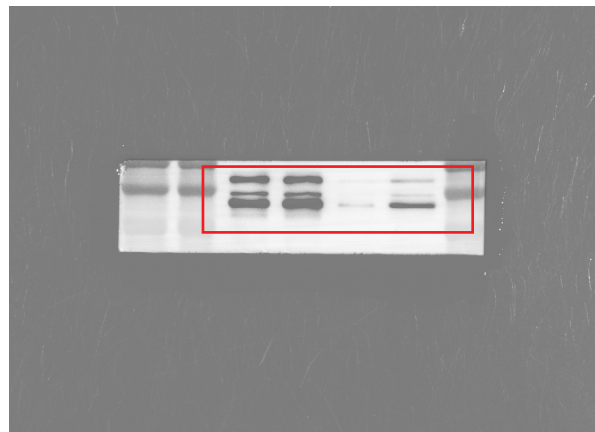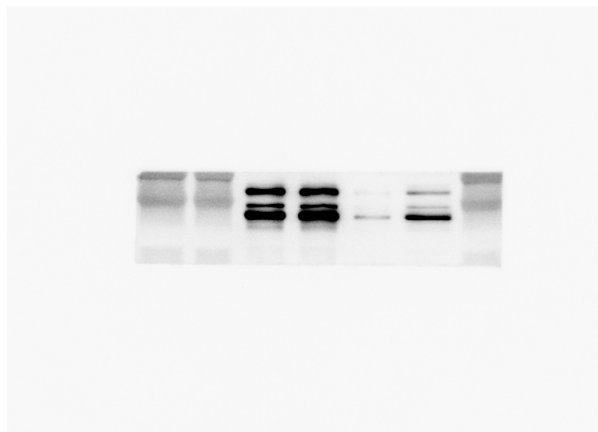

GST

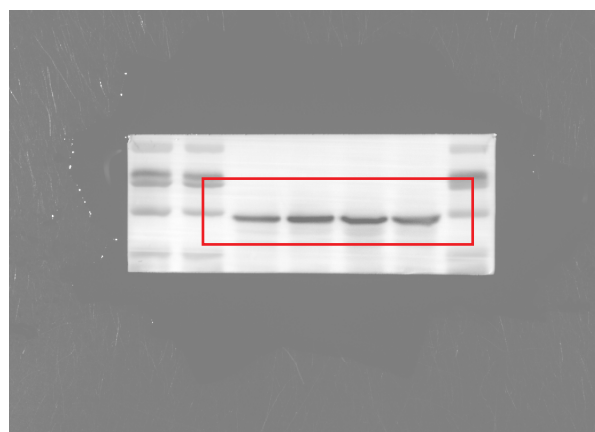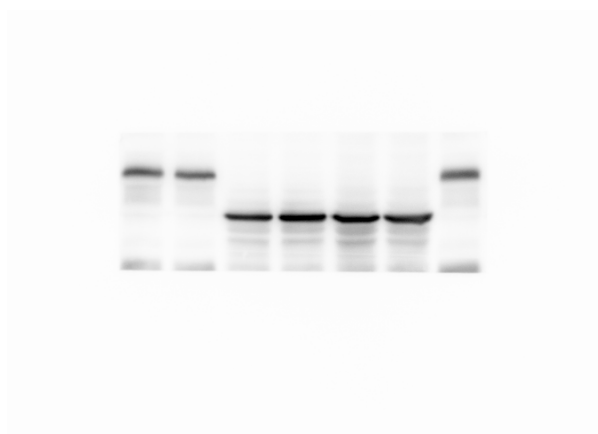

Fig.5e

ILF3

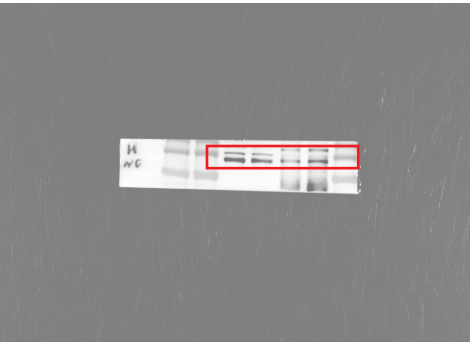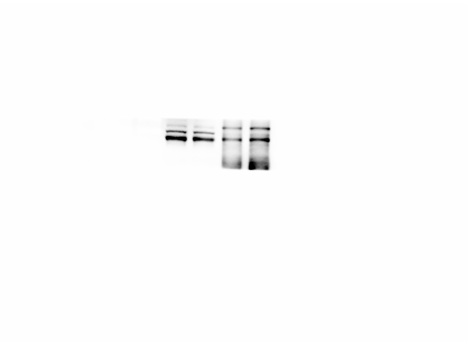

$\beta$ -actin

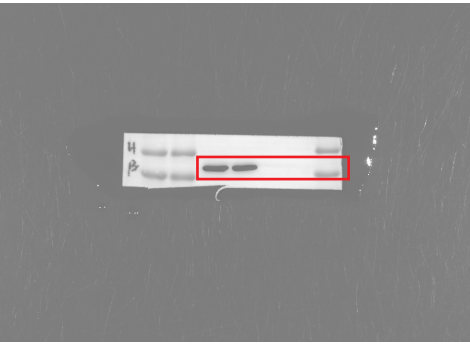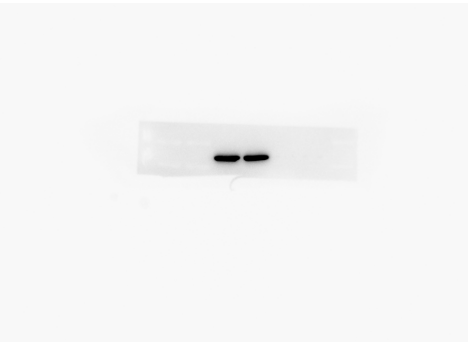

Laminb

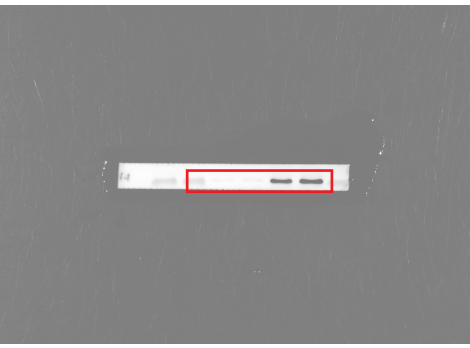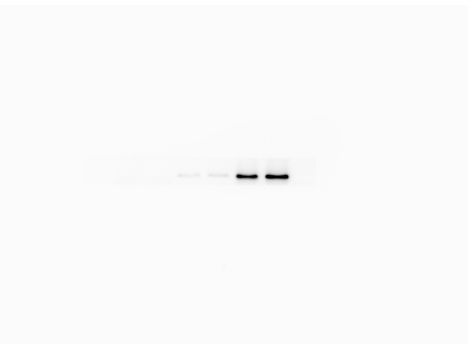

ILF3

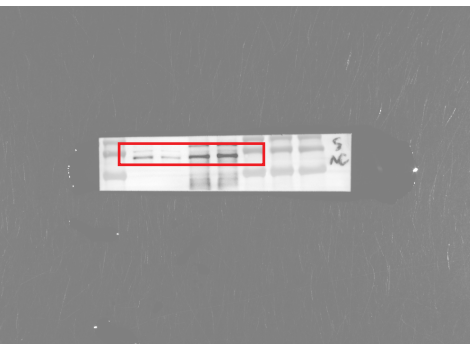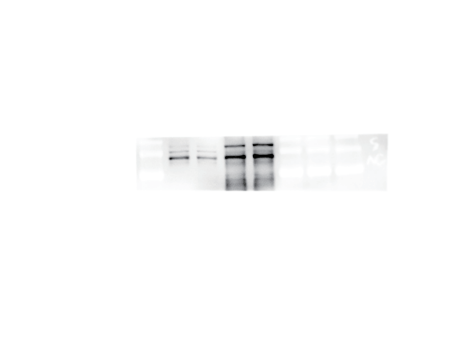

$\beta$ -actin

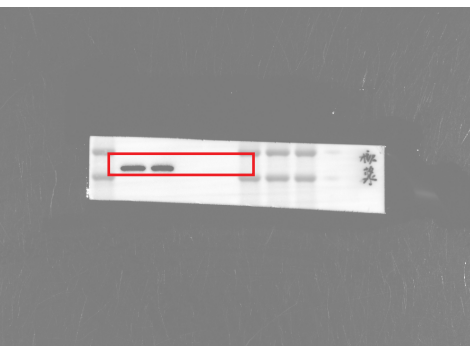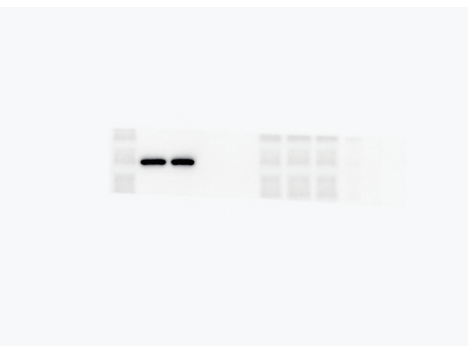

Laminb

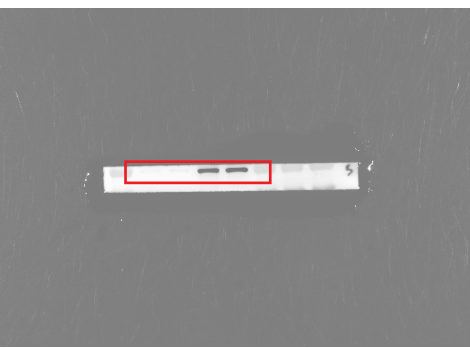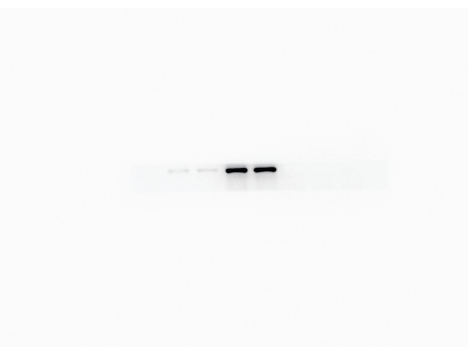

Fig.5f

exportin-5

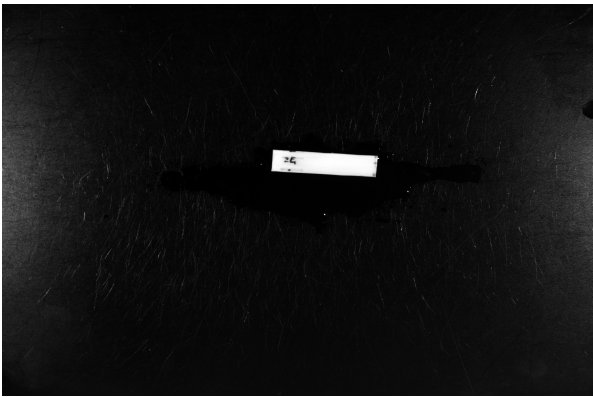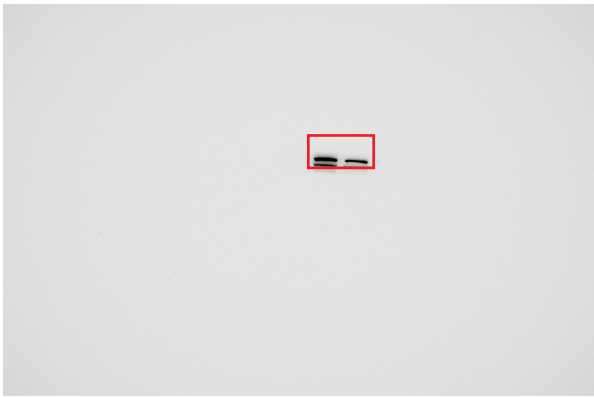

Flag

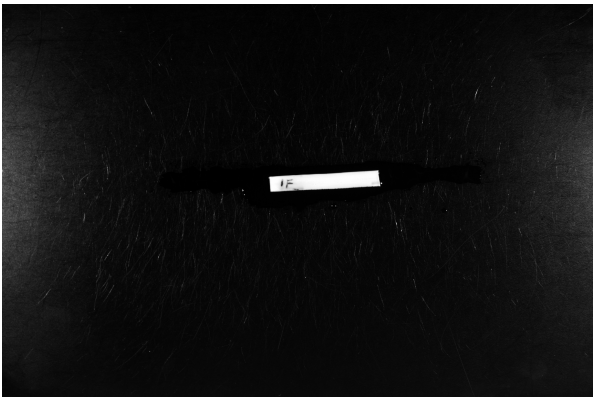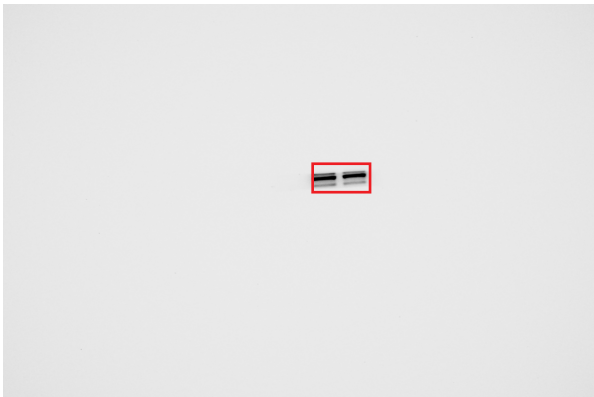

exportin-5

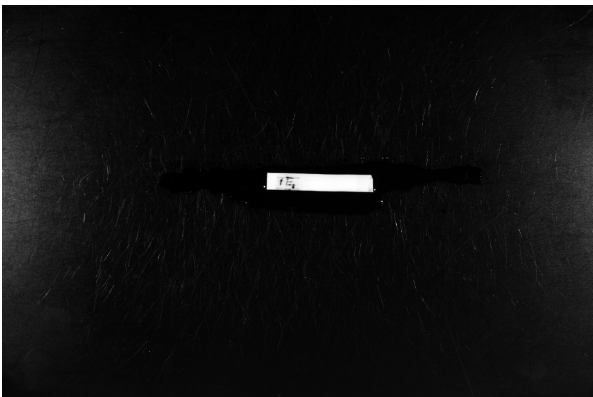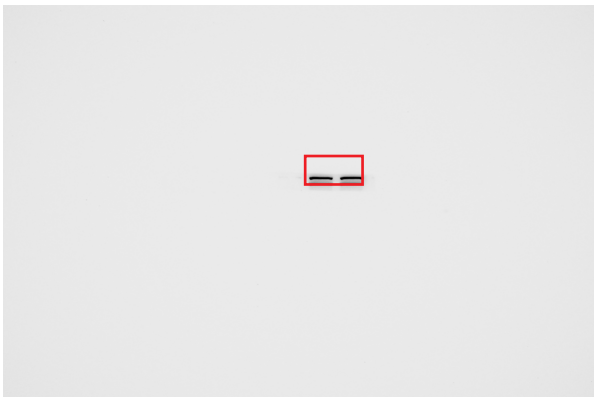

Flag

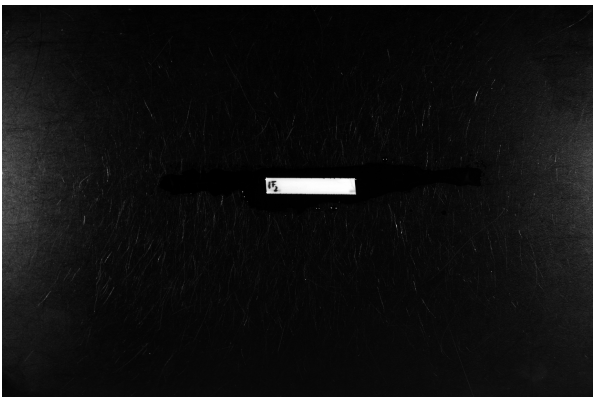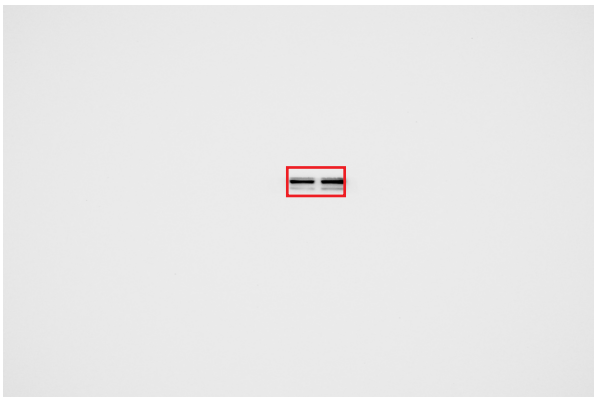

GAPDH

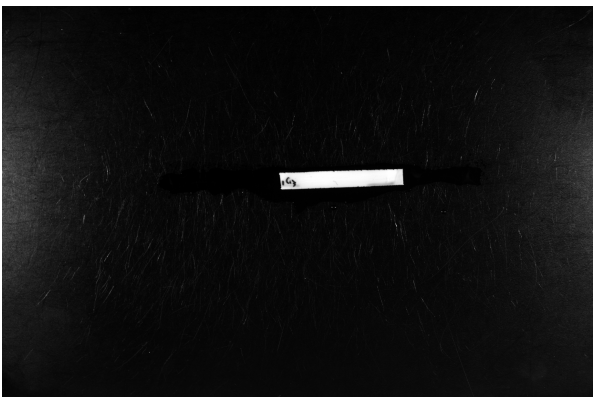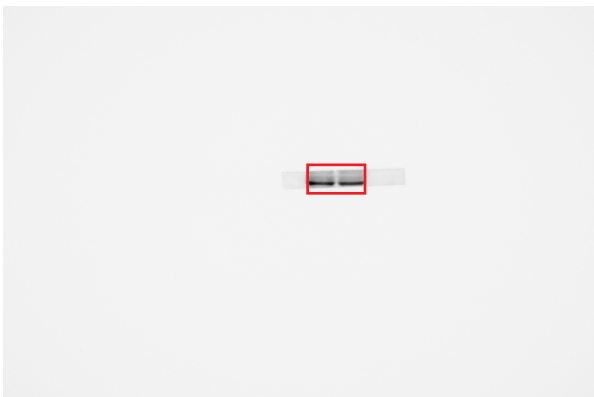

Fig.S5b

IL-36 $\gamma$

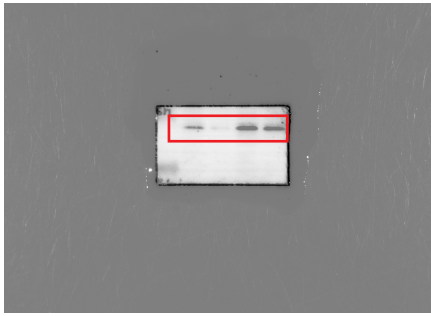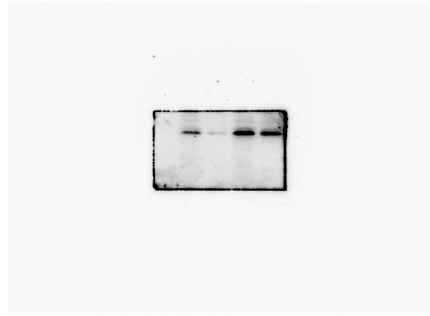

GAPDH

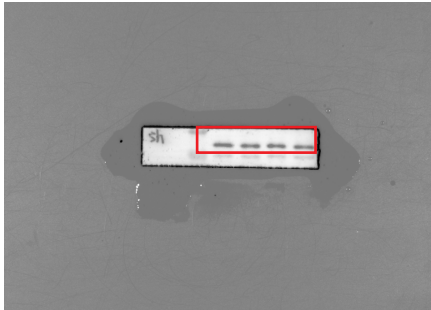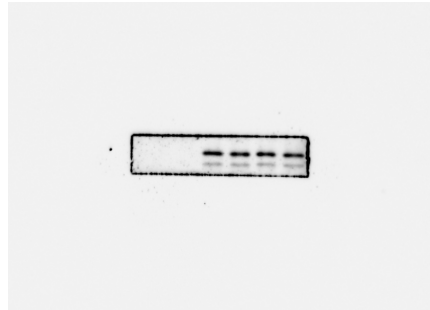

Fig.S6a

IL-36 $\gamma$

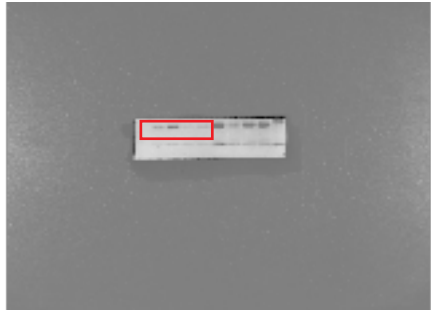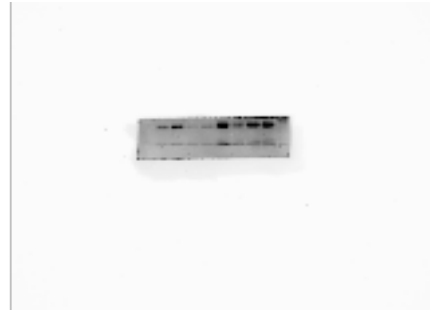

GAPDH

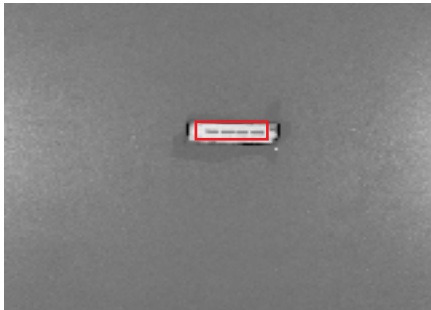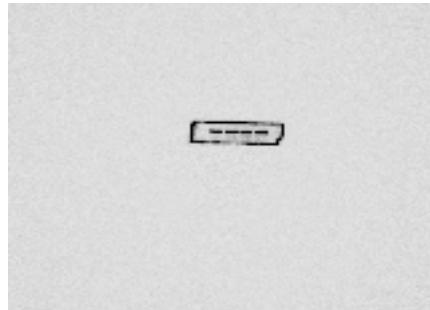

Fig.S6b

IL-36 $\gamma$

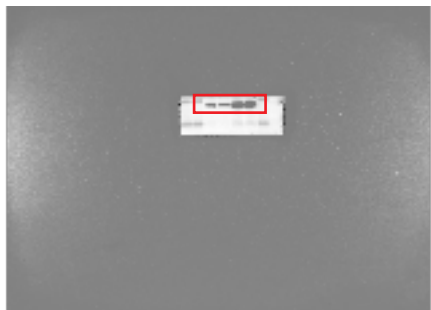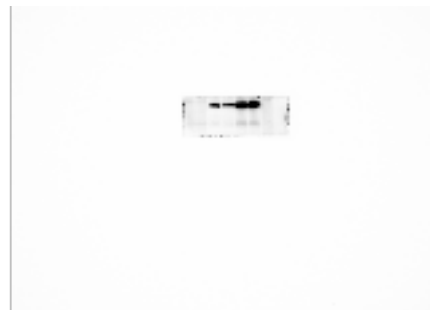

GAPDH

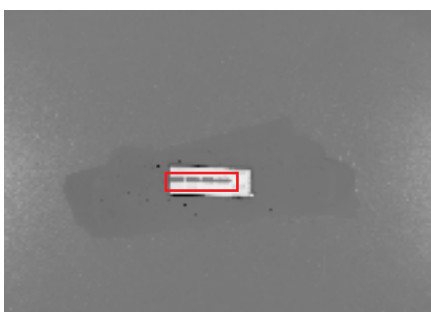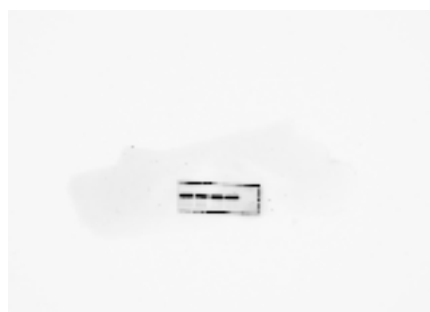

Fig.S7a

GST

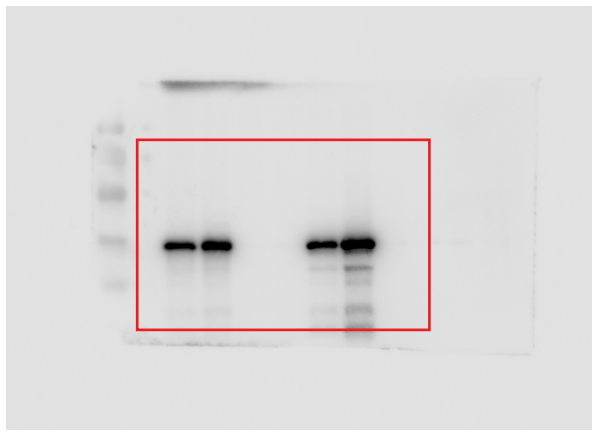

Fig. S7c

Flag

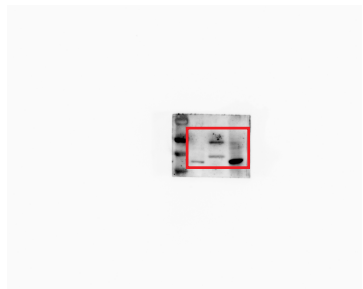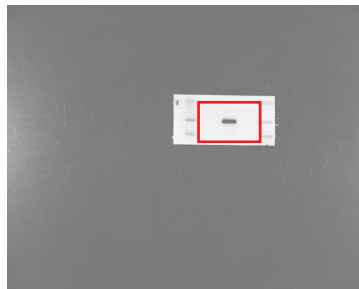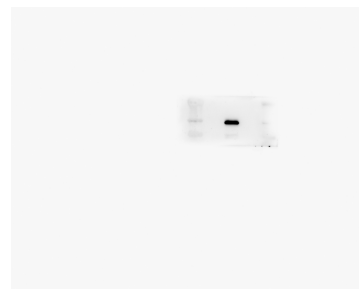

GST

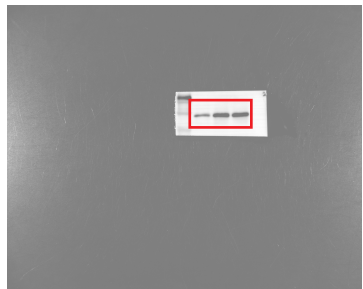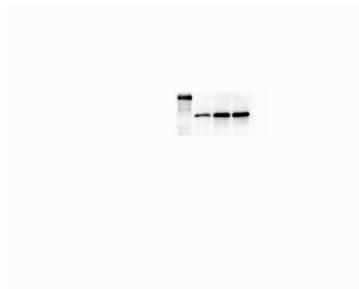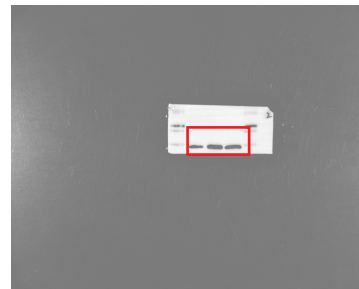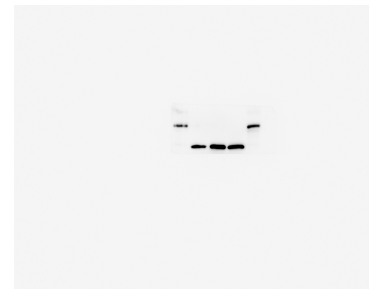

Vinculin

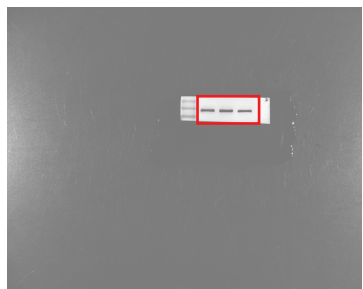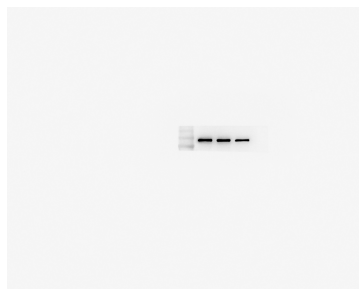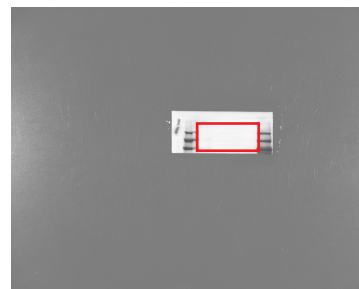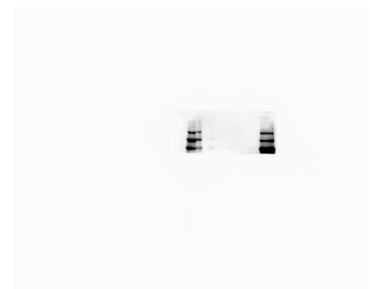

Supplement: 12943_2024_2192_MOESM8_ESM.pdf [file 12943_2024_2192_MOESM8_ESM.pdf]
